# Supplementary material for: Genomic sequence and copy number evolution during hybrid crop development in sunflowers
Source: PubMed Central journal article supplement (PMC6304689; doi:10.1111/eva.12603), 2018-02-20

# Differentiated P/A genes

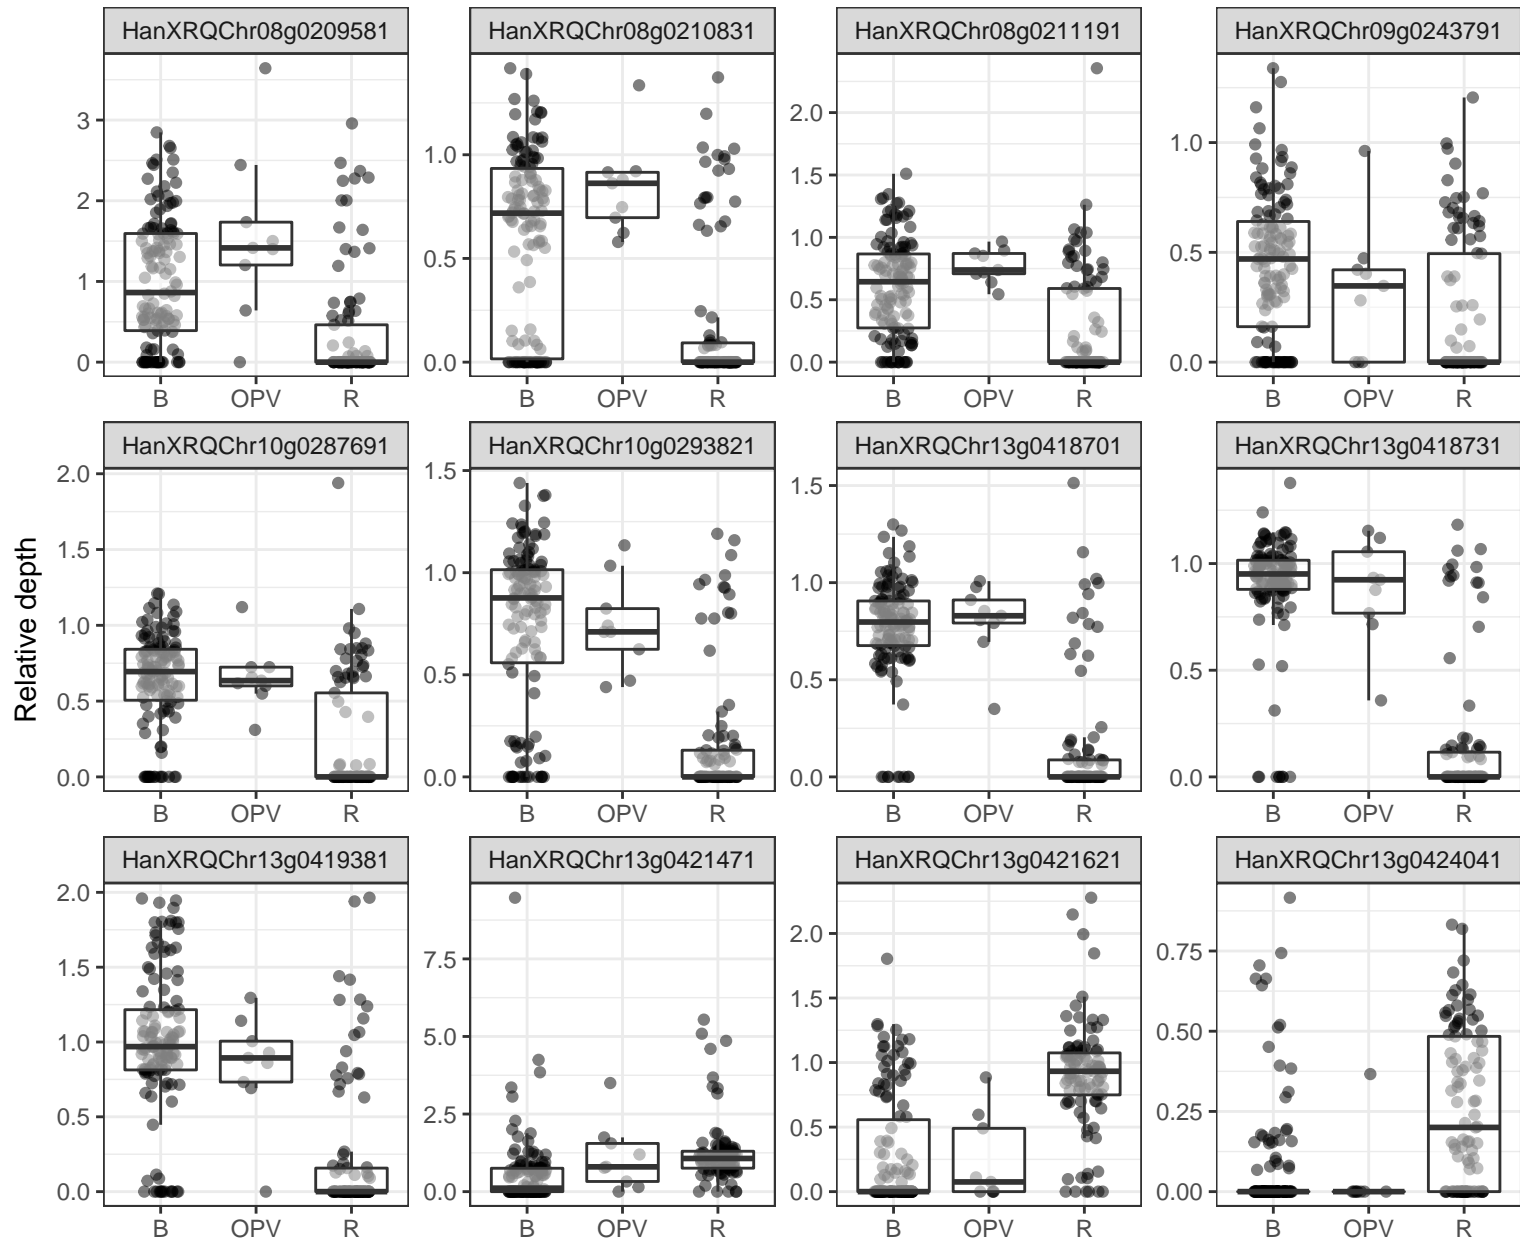

# Differentiated amplified genes

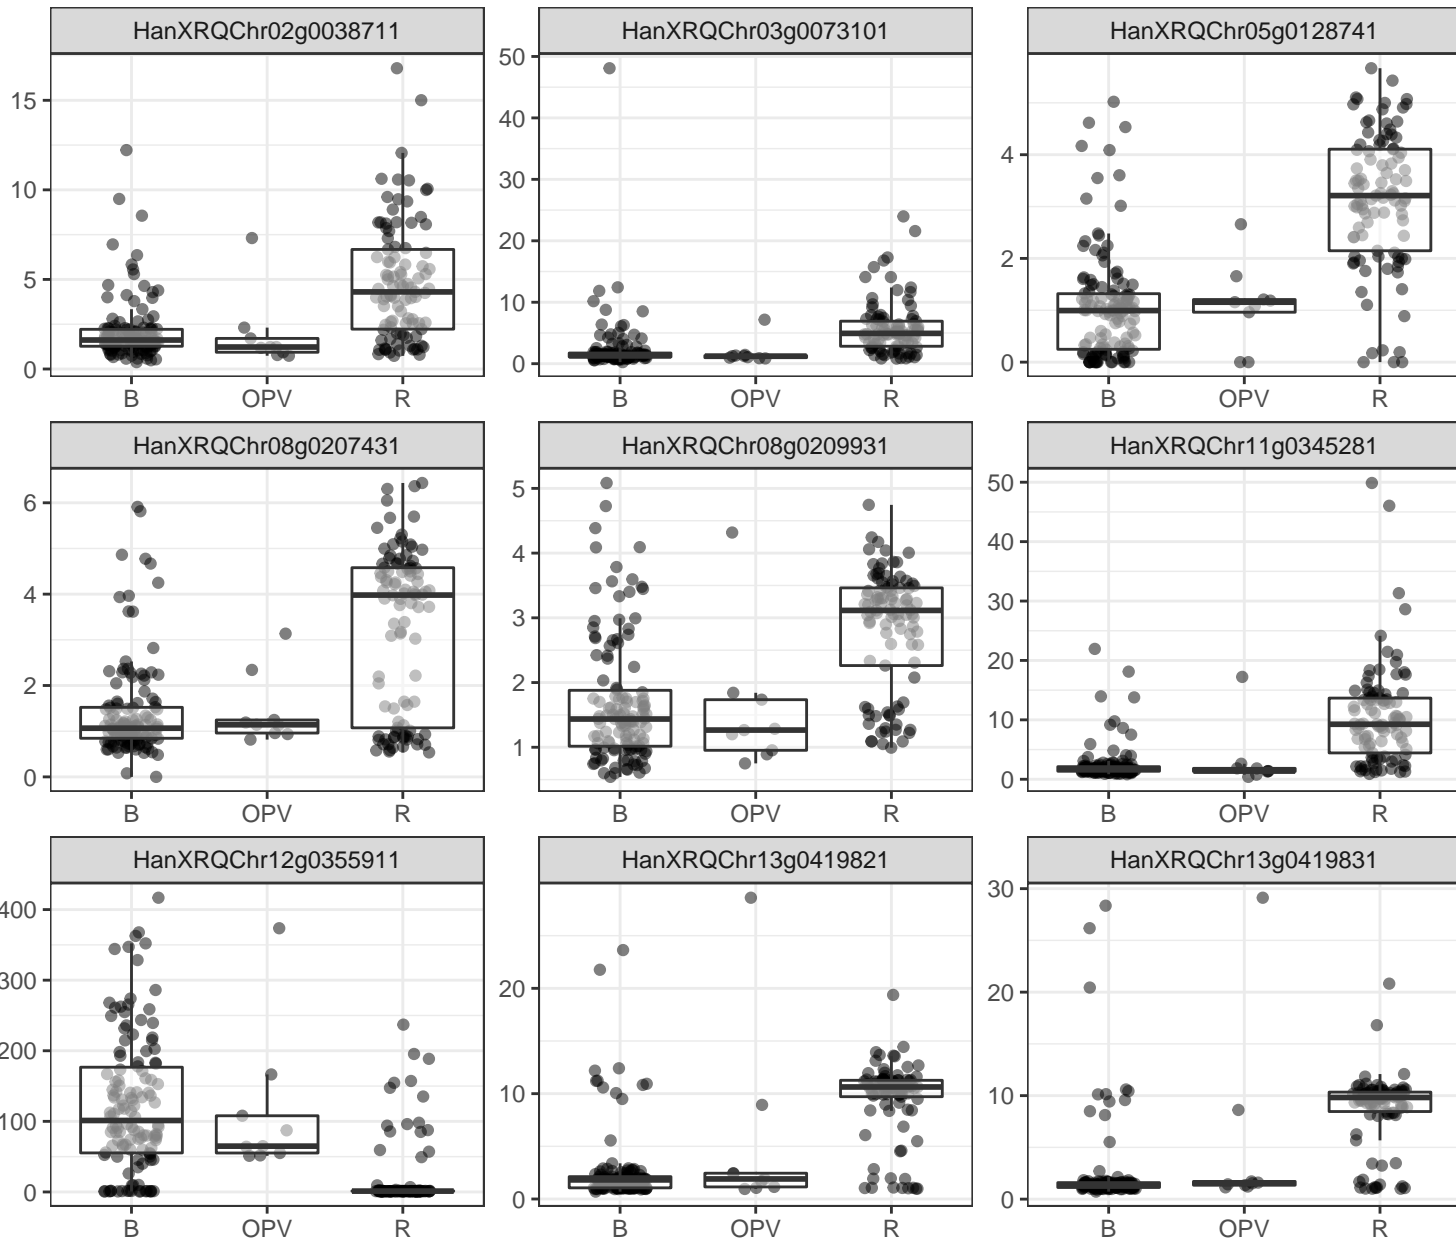

Supplement: EVA-12-54-s003.pdf [file EVA-12-54-s003.pdf]
